# Supplementary material for: Autoantibodies Affect Brain Density Reduction in Nonneuropsychiatric Systemic Lupus Erythematosus Patients
Source: Hindawi journal article supplement (doi:10.1155/2015/920718), 2015-01-01
Supplement: f1 [file 920718.f1.pdf]

Supplementary Table 1 GMD/ WMD of SLE patients with different therapies.

|     | group |        |        |        |          |        |        |        | Comparison |         |             |
|-----|-------|--------|--------|--------|----------|--------|--------|--------|------------|---------|-------------|
|     | CTX   |        | HCQ    |        | CTX+HCQ  |        | NI     |        | CTX: NI    | HCQ: NI | CTX+HCQ: NI |
|     | N=17  |        | N=32   |        | Q<br>N=6 |        | N=40   |        |            |         |             |
|     | Mean  | SD     | Mean   | SD     | Mean     | SD     | Mean   | SD     | P          |         |             |
| GMD | 0.542 | 0.0210 | 0.5494 | 0.0207 | 0.5545   | 0.0308 | 0.5411 | 0.0292 | 0.790      | 0.730   | 0.133       |
|     | 7     |        |        |        |          |        |        |        |            |         |             |
| WMD | 0.528 | 0.0266 | 0.5243 | 0.0206 | 0.5299   | 0.0243 | 0.5076 | 0.0247 | 0.004**    | 0.004** | 0.029*      |
|     | 1     |        |        |        |          |        |        |        |            |         |             |

GMD: mean whole brain grey matter density; WMD: mean whole brain white matter density; CTX: cyclophosphamide; HCQ: hydroxychloroquine; NI: non-immunosuppressive treatment; \*p<0.05, \*\* p<0.01
